# Supplementary material for: Neurons Release Injured Mitochondria as “Help-Me” Signaling After Ischemic Stroke
Source: Front Aging Neurosci. 2022 Mar 3;14:785761. doi: 10.3389/fnagi.2022.785761 (PMC8926840; doi:10.3389/fnagi.2022.785761)
Supplement: Supplementary file 1 [file Table_1.XLS]

## Sheet: Results
Block Type	96well
Chemistry	SYBR_GREEN
Experiment Run End Time	2021-12-22 10:32:40 AM CST
Instrument Type	steponeplus
Passive Reference	ROX
Well	Sample Name	Target Name	Task	Reporter	Quencher	RQ	RQ Min	RQ Max	Cт	Cт Mean	Cт SD	ΔCт	ΔCт Mean	ΔCт SE	HK Control ΔCт Mean	HK Control ΔCт SE	ΔΔCт	Automatic Ct Threshold	Ct Threshold	Automatic Baseline	Baseline Start	Baseline End	Efficiency	Comments	HIGHSD	OUTLIERRG
A6	PH6.5	Miro-1	UNKNOWN	SYBR	None	0.00433304	0.00222284	0.00844652	28.1614	28.2894	0.138997		7.78264	0.417595			7.8504	TRUE	0.77653	TRUE	3	16	1		N	N
A12	PH6.5	mbactin	UNKNOWN	SYBR	None				22.0097	20.5068	0.923369							TRUE	0.776292	TRUE	3	11	1		Y	N
B6	PH6.5	Miro-1	UNKNOWN	SYBR	None	0.00433304	0.00222284	0.00844652	28.2678	28.2894	0.138997		7.78264	0.417595			7.8504	TRUE	0.77653	TRUE	3	19	1		N	N
B12	PH6.5	mbactin	UNKNOWN	SYBR	None				20.5768	20.5068	0.923369							TRUE	0.776292	TRUE	3	8	1		Y	N
C6	PH6.5	Miro-1	UNKNOWN	SYBR	None	0.00433304	0.00222284	0.00844652	28.3039	28.2894	0.138997		7.78264	0.417595			7.8504	TRUE	0.77653	TRUE	3	17	1		N	N
C12	PH6.5	mbactin	UNKNOWN	SYBR	None				19.7375	20.5068	0.923369							TRUE	0.776292	TRUE	1	2	1		Y	N
D6	PH6.5	Miro-1	UNKNOWN	SYBR	None	0.00433304	0.00222284	0.00844652	28.5168	28.2894	0.138997		7.78264	0.417595			7.8504	TRUE	0.77653	TRUE	3	18	1		N	N
D12	PH6.5	mbactin	UNKNOWN	SYBR	None				19.7643	20.5068	0.923369							TRUE	0.776292	TRUE	1	3	1		Y	N
E1	PH7.4 MD	Miro-1	UNKNOWN	SYBR	None	0.00104733	0.00088373	0.00124121	29.8641	29.6272	0.17651		9.83131	0.106258			9.89907	TRUE	0.77653	TRUE	3	23	1		N	N
E2	PH7.4 MD	Miro-1	UNKNOWN	SYBR	None	0.00104733	0.00088373	0.00124121	29.666	29.6272	0.17651		9.83131	0.106258			9.89907	TRUE	0.77653	TRUE	3	23	1		N	N
E3	PH7.4 MD	Miro-1	UNKNOWN	SYBR	None	0.00104733	0.00088373	0.00124121	29.3707	29.6272	0.17651		9.83131	0.106258			9.89907	TRUE	0.77653	TRUE	3	23	1		N	N
E4	PH7.4 MD	Miro-1	UNKNOWN	SYBR	None	0.00104733	0.00088373	0.00124121	29.5952	29.6272	0.17651		9.83131	0.106258			9.89907	TRUE	0.77653	TRUE	3	23	1		N	N
E5	PH7.4 MD	Miro-1	UNKNOWN	SYBR	None	0.00104733	0.00088373	0.00124121	29.6401	29.6272	0.17651		9.83131	0.106258			9.89907	TRUE	0.77653	TRUE	3	23	1		N	N
E6	PH6.5	Miro-1	UNKNOWN	SYBR	None	0.00433304	0.00222284	0.00844652	28.1972	28.2894	0.138997		7.78264	0.417595			7.8504	TRUE	0.77653	TRUE	3	20	1		N	N
E7	PH7.4 MD	mbactin	UNKNOWN	SYBR	None				19.7322	19.7959	0.159055							TRUE	0.776292	TRUE	3	13	1		N	N
E8	PH7.4 MD	mbactin	UNKNOWN	SYBR	None				19.6667	19.7959	0.159055							TRUE	0.776292	TRUE	3	13	1		N	N
E9	PH7.4 MD	mbactin	UNKNOWN	SYBR	None				20.0566	19.7959	0.159055							TRUE	0.776292	TRUE	3	13	1		N	N
E10	PH7.4 MD	mbactin	UNKNOWN	SYBR	None				19.8335	19.7959	0.159055							TRUE	0.776292	TRUE	3	13	1		N	N
E11	PH7.4 MD	mbactin	UNKNOWN	SYBR	None				19.6906	19.7959	0.159055							TRUE	0.776292	TRUE	3	13	1		N	N
E12	PH6.5	mbactin	UNKNOWN	SYBR	None				20.4455	20.5068	0.923369							TRUE	0.776292	TRUE	3	10	1		Y	N
F1	PH7.4	Miro-1	UNKNOWN	SYBR	None	0.00255174	0.00156429	0.00416251	27.212	28.1691	0.664496		8.54653	0.306145			8.6143	TRUE	0.77653	TRUE	1	2	1		Y	N
F2	PH7.4	Miro-1	UNKNOWN	SYBR	None	0.00255174	0.00156429	0.00416251	28.4645	28.1691	0.664496		8.54653	0.306145			8.6143	TRUE	0.77653	TRUE	3	10	1		Y	N
F3	PH7.4	Miro-1	UNKNOWN	SYBR	None	0.00255174	0.00156429	0.00416251	27.7594	28.1691	0.664496		8.54653	0.306145			8.6143	TRUE	0.77653	TRUE	1	3	1		Y	N
F4	PH7.4	Miro-1	UNKNOWN	SYBR	None	0.00255174	0.00156429	0.00416251	28.8075	28.1691	0.664496		8.54653	0.306145			8.6143	TRUE	0.77653	TRUE	3	16	1		Y	N
F5	PH7.4	Miro-1	UNKNOWN	SYBR	None	0.00255174	0.00156429	0.00416251	28.6021	28.1691	0.664496		8.54653	0.306145			8.6143	TRUE	0.77653	TRUE	3	16	1		Y	N
F7	PH7.4	mbactin	UNKNOWN	SYBR	None				19.3664	19.6226	0.164528							TRUE	0.776292	TRUE	1	3	1		N	N
F8	PH7.4	mbactin	UNKNOWN	SYBR	None				19.6592	19.6226	0.164528							TRUE	0.776292	TRUE	1	3	1		N	N
F9	PH7.4	mbactin	UNKNOWN	SYBR	None				19.6247	19.6226	0.164528							TRUE	0.776292	TRUE	1	2	1		N	N
F10	PH7.4	mbactin	UNKNOWN	SYBR	None				19.6374	19.6226	0.164528							TRUE	0.776292	TRUE	1	2	1		N	N
F11	PH7.4	mbactin	UNKNOWN	SYBR	None				19.8253	19.6226	0.164528							TRUE	0.776292	TRUE	1	2	1		N	N
H1	PH6.5 MD	Miro-1	UNKNOWN	SYBR	None	0.00116617	0.0008365	0.00162577	28.8814	28.7803	0.161478		9.67624	0.207868			9.744	TRUE	0.77653	TRUE	3	16	1		N	N
H2	PH6.5 MD	Miro-1	UNKNOWN	SYBR	None	0.00116617	0.0008365	0.00162577	28.501	28.7803	0.161478		9.67624	0.207868			9.744	TRUE	0.77653	TRUE	3	12	1		N	Y
H3	PH6.5 MD	Miro-1	UNKNOWN	SYBR	None	0.00116617	0.0008365	0.00162577	28.9	28.7803	0.161478		9.67624	0.207868			9.744	TRUE	0.77653	TRUE	3	14	1		N	N
H4	PH6.5 MD	Miro-1	UNKNOWN	SYBR	None	0.00116617	0.0008365	0.00162577	28.8044	28.7803	0.161478		9.67624	0.207868			9.744	TRUE	0.77653	TRUE	3	10	1		N	N
H5	PH6.5 MD	Miro-1	UNKNOWN	SYBR	None	0.00116617	0.0008365	0.00162577	28.8146	28.7803	0.161478		9.67624	0.207868			9.744	TRUE	0.77653	TRUE	3	17	1		N	N
H7	PH6.5 MD	mbactin	UNKNOWN	SYBR	None				18.8372	19.104	0.435855							TRUE	0.776292	TRUE	1	2	1		N	N
H8	PH6.5 MD	mbactin	UNKNOWN	SYBR	None				18.8857	19.104	0.435855							TRUE	0.776292	TRUE	1	3	1		N	N
H9	PH6.5 MD	mbactin	UNKNOWN	SYBR	None				18.7021	19.104	0.435855							TRUE	0.776292	TRUE	1	2	1		N	N
H10	PH6.5 MD	mbactin	UNKNOWN	SYBR	None				19.3403	19.104	0.435855							TRUE	0.776292	TRUE	3	8	1		N	N
H11	PH6.5 MD	mbactin	UNKNOWN	SYBR	None				19.7549	19.104	0.435855							TRUE	0.776292	TRUE	3	10	1		N	N
Analysis Type	Singleplex
Endogenous Control	mbactin
RQ Min/Max Confidence Level	95.0
Reference Sample

## Sheet: 最终结果1
Block Type	96well
Chemistry	SYBR_GREEN
Experiment Run End Time	2021-12-22 10:32:40 AM CST
Instrument Type	steponeplus
Passive Reference	ROX
F1	PH7.4	Miro-1	27.212					F7	PH7.4	mbactin	19.3664
F2	PH7.4	Miro-1	28.4645	27.8383	8.32547		1	F8	PH7.4	mbactin	19.6592	19.5128
F3	PH7.4	Miro-1	27.7594					F9	PH7.4	mbactin	19.6247
F4	PH7.4	Miro-1	28.8075	28.2835	8.65245		1	F10	PH7.4	mbactin	19.6374	19.631
F5	PH7.4	Miro-1	28.6021					F11	PH7.4	mbactin	19.8253
F6	PH7.4	Miro-1	28.1231	28.3626	8.84232		1	F12	PH7.4	mbactin	19.2153	19.5203
E1	PH7.4 MD	Miro-1	29.8641					E7	PH7.4 MD	mbactin	19.7322
E2	PH7.4 MD	Miro-1	29.666	29.7651	10.0656	1.74012	0.299344	E8	PH7.4 MD	mbactin	19.6667	19.6995
E3	PH7.4 MD	Miro-1	29.3707					E9	PH7.4 MD	mbactin	20.0566
E4	PH7.4 MD	Miro-1	29.5952	29.4829	9.5379	0.885446	0.54132	E10	PH7.4 MD	mbactin	19.8335	19.945
E5	PH7.4 MD	Miro-1	29.6401					E11	PH7.4 MD	mbactin	19.6906
G1	PH7.4 MD	Miro-1	29.2301	29.4351	9.97454	1.13223	0.456211	G1	PH7.4 MD	mbactin	19.2306	19.4606
A6	PH6.5	Miro-1	28.1614					A12	PH6.5	mbactin	22.0097
B6	PH6.5	Miro-1	28.2678	28.2146	6.92135	-1.40412	2.64656	B12	PH6.5	mbactin	20.5768	21.2933
C6	PH6.5	Miro-1	28.3039					C12	PH6.5	mbactin	19.7375
D6	PH6.5	Miro-1	28.5168	28.4104	8.15943	-0.493027	1.40739	D12	PH6.5	mbactin	20.7643	20.2509
E6	PH6.5	Miro-1	28.1972					E12	PH6.5	mbactin	20.4455
G6	PH6.5	Miro-1	28.0272	28.1122	7.81662	-1.0257	2.03595	G6	PH6.5	mbactin	20.1455	20.2955
H1	PH6.5 MD	Miro-1	28.8814					H7	PH6.5 MD	mbactin	18.8372
H2	PH6.5 MD	Miro-1	28.501	28.6912	9.82974	1.50427	0.352509	H8	PH6.5 MD	mbactin	18.8857	18.8615
H3	PH6.5 MD	Miro-1	28.9					H9	PH6.5 MD	mbactin	18.7021
H4	PH6.5 MD	Miro-1	28.8044	28.8522	9.831	1.17855	0.441796	H10	PH6.5 MD	mbactin	19.3403	19.0212
H5	PH6.5 MD	Miro-1	28.8146					H11	PH6.5 MD	mbactin	19.7549
H6	PH6.5 MD	Miro-1	28.3546	28.5846	8.8297	-0.0126192	1.00879	H11	PH6.5 MD	mbactin	19.7549	19.7549
