# Supplementary material for: Neurons Release Injured Mitochondria as “Help-Me” Signaling After Ischemic Stroke
Source: Front Aging Neurosci. 2022 Mar 3;14:785761. doi: 10.3389/fnagi.2022.785761 (PMC8926840; doi:10.3389/fnagi.2022.785761)
Supplement: Supplementary file 2 [file Table_2.XLS]

## Sheet: Sample Setup
Block Type	96well
Chemistry	SYBR_GREEN
Experiment Run End Time	2021-12-23 13:29:37 PM CST
Instrument Type	steponeplus
Passive Reference	ROX
Well	Sample Name	Sample Color	Biogroup Name	Biogroup Color	Target Name	Target Color	Task	Reporter	Quencher	Comments
A1	PH6.5	RGB(132,193,241)			Miro-1	RGB(139,189,249)	UNKNOWN	SYBR	None
A2	PH6.5	RGB(132,193,241)			Miro-1	RGB(139,189,249)	UNKNOWN	SYBR	None
A3	PH6.5	RGB(132,193,241)			Miro-1	RGB(139,189,249)	UNKNOWN	SYBR	None
A4	PH6.5	RGB(132,193,241)			Miro-1	RGB(139,189,249)	UNKNOWN	SYBR	None
A5	PH6.5	RGB(132,193,241)			Miro-1	RGB(139,189,249)	UNKNOWN	SYBR	None
A6	PH6.5	RGB(132,193,241)			Miro-1	RGB(139,189,249)	UNKNOWN	SYBR	None
A7	PH6.5	RGB(132,193,241)			mbactin	RGB(208,243,98)	UNKNOWN	SYBR	None
A8	PH6.5	RGB(132,193,241)			mbactin	RGB(208,243,98)	UNKNOWN	SYBR	None
A9	PH6.5	RGB(132,193,241)			mbactin	RGB(208,243,98)	UNKNOWN	SYBR	None
A10	PH6.5	RGB(132,193,241)			mbactin	RGB(208,243,98)	UNKNOWN	SYBR	None
A11	PH6.5	RGB(132,193,241)			mbactin	RGB(208,243,98)	UNKNOWN	SYBR	None
A12	PH6.5	RGB(132,193,241)			mbactin	RGB(208,243,98)	UNKNOWN	SYBR	None
B1	Ph7.4 Md	RGB(168,255,222)			Miro-1	RGB(139,189,249)	UNKNOWN	SYBR	None
B2	Ph7.4 Md	RGB(168,255,222)			Miro-1	RGB(139,189,249)	UNKNOWN	SYBR	None
B3	Ph7.4 Md	RGB(168,255,222)			Miro-1	RGB(139,189,249)	UNKNOWN	SYBR	None
B4	Ph7.4 Md	RGB(168,255,222)			Miro-1	RGB(139,189,249)	UNKNOWN	SYBR	None
B5	Ph7.4 Md	RGB(168,255,222)			Miro-1	RGB(139,189,249)	UNKNOWN	SYBR	None
B6	Ph7.4 Md	RGB(168,255,222)			Miro-1	RGB(139,189,249)	UNKNOWN	SYBR	None
B7	Ph7.4 Md	RGB(168,255,222)			mbactin	RGB(208,243,98)	UNKNOWN	SYBR	None
B8	Ph7.4 Md	RGB(168,255,222)			mbactin	RGB(208,243,98)	UNKNOWN	SYBR	None
B9	Ph7.4 Md	RGB(168,255,222)			mbactin	RGB(208,243,98)	UNKNOWN	SYBR	None
B10	Ph7.4 Md	RGB(168,255,222)			mbactin	RGB(208,243,98)	UNKNOWN	SYBR	None
B11	Ph7.4 Md	RGB(168,255,222)			mbactin	RGB(208,243,98)	UNKNOWN	SYBR	None
B12	Ph7.4 Md	RGB(168,255,222)			mbactin	RGB(208,243,98)	UNKNOWN	SYBR	None
C1	PH7.4	RGB(223,221,142)			Miro-1	RGB(139,189,249)	UNKNOWN	SYBR	None
C2	PH7.4	RGB(223,221,142)			Miro-1	RGB(139,189,249)	UNKNOWN	SYBR	None
C3	PH7.4	RGB(223,221,142)			Miro-1	RGB(139,189,249)	UNKNOWN	SYBR	None
C4	PH7.4	RGB(223,221,142)			Miro-1	RGB(139,189,249)	UNKNOWN	SYBR	None
C5	PH7.4	RGB(223,221,142)			Miro-1	RGB(139,189,249)	UNKNOWN	SYBR	None
C6	PH7.4	RGB(223,221,142)			Miro-1	RGB(139,189,249)	UNKNOWN	SYBR	None
C7	PH7.4	RGB(223,221,142)			mbactin	RGB(208,243,98)	UNKNOWN	SYBR	None
C8	PH7.4	RGB(223,221,142)			mbactin	RGB(208,243,98)	UNKNOWN	SYBR	None
C9	PH7.4	RGB(223,221,142)			mbactin	RGB(208,243,98)	UNKNOWN	SYBR	None
C10	PH7.4	RGB(223,221,142)			mbactin	RGB(208,243,98)	UNKNOWN	SYBR	None
C11	PH7.4	RGB(223,221,142)			mbactin	RGB(208,243,98)	UNKNOWN	SYBR	None
C12	PH7.4	RGB(223,221,142)			mbactin	RGB(208,243,98)	UNKNOWN	SYBR	None
D1	PH6.5 Md	RGB(247,255,168)			Miro-1	RGB(139,189,249)	UNKNOWN	SYBR	None
D2	PH6.5 Md	RGB(247,255,168)			Miro-1	RGB(139,189,249)	UNKNOWN	SYBR	None
D3	PH6.5 Md	RGB(247,255,168)			Miro-1	RGB(139,189,249)	UNKNOWN	SYBR	None
D4	PH6.5 Md	RGB(247,255,168)			Miro-1	RGB(139,189,249)	UNKNOWN	SYBR	None
D5	PH6.5 Md	RGB(247,255,168)			Miro-1	RGB(139,189,249)	UNKNOWN	SYBR	None
D6	PH6.5 Md	RGB(247,255,168)			Miro-1	RGB(139,189,249)	UNKNOWN	SYBR	None
D7	PH6.5 Md	RGB(247,255,168)			mbactin	RGB(208,243,98)	UNKNOWN	SYBR	None
D8	PH6.5 Md	RGB(247,255,168)			mbactin	RGB(208,243,98)	UNKNOWN	SYBR	None
D9	PH6.5 Md	RGB(247,255,168)			mbactin	RGB(208,243,98)	UNKNOWN	SYBR	None
D10	PH6.5 Md	RGB(247,255,168)			mbactin	RGB(208,243,98)	UNKNOWN	SYBR	None
D11	PH6.5 Md	RGB(247,255,168)			mbactin	RGB(208,243,98)	UNKNOWN	SYBR	None
D12	PH6.5 Md	RGB(247,255,168)			mbactin	RGB(208,243,98)	UNKNOWN	SYBR	None

## Sheet: Results
Block Type	96well
Chemistry	SYBR_GREEN
Experiment Run End Time	2021-12-23 13:29:37 PM CST
Instrument Type	steponeplus
Passive Reference	ROX
Well	Sample Name	Target Name	Task	Reporter	Quencher	RQ	RQ Min	RQ Max	Cт	Cт Mean	Cт SD	ΔCт	ΔCт Mean	ΔCт SE	HK Control ΔCт Mean	HK Control ΔCт SE	ΔΔCт	Automatic Ct Threshold	Ct Threshold	Automatic Baseline	Baseline Start	Baseline End	Efficiency	Comments	HIGHSD
A1	PH6.5	Miro-1	UNKNOWN	SYBR	None	1	0.886108	1.12853	23.4859	23.4539	0.0694533		9.08001	0.0782923			0	TRUE	0.593374	TRUE	3	17	1		N
A2	PH6.5	Miro-1	UNKNOWN	SYBR	None	1	0.886108	1.12853	23.4318	23.4539	0.0694533		9.08001	0.0782923			0	TRUE	0.593374	TRUE	3	17	1		N
A3	PH6.5	Miro-1	UNKNOWN	SYBR	None	1	0.886108	1.12853	23.4454	23.4539	0.0694533		9.08001	0.0782923			0	TRUE	0.593374	TRUE	3	17	1		N
A4	PH6.5	Miro-1	UNKNOWN	SYBR	None	1	0.886108	1.12853	23.3685	23.4539	0.0694533		9.08001	0.0782923			0	TRUE	0.593374	TRUE	3	17	1		N
A5	PH6.5	Miro-1	UNKNOWN	SYBR	None	1	0.886108	1.12853	23.5725	23.4539	0.0694533		9.08001	0.0782923			0	TRUE	0.593374	TRUE	3	17	1		N
A6	PH6.5	Miro-1	UNKNOWN	SYBR	None	1	0.886108	1.12853	23.4196	23.4539	0.0694533		9.08001	0.0782923			0	TRUE	0.593374	TRUE	3	17	1		N
A7	PH6.5	mbactin	UNKNOWN	SYBR	None				14.3083	14.3739	0.178758							TRUE	0.647241	TRUE	3	7	1		N
A8	PH6.5	mbactin	UNKNOWN	SYBR	None				14.176	14.3739	0.178758							TRUE	0.647241	TRUE	3	8	1		N
A9	PH6.5	mbactin	UNKNOWN	SYBR	None				14.3353	14.3739	0.178758							TRUE	0.647241	TRUE	3	7	1		N
A10	PH6.5	mbactin	UNKNOWN	SYBR	None				14.3824	14.3739	0.178758							TRUE	0.647241	TRUE	3	8	1		N
A11	PH6.5	mbactin	UNKNOWN	SYBR	None				14.3315	14.3739	0.178758							TRUE	0.647241	TRUE	3	8	1		N
A12	PH6.5	mbactin	UNKNOWN	SYBR	None				14.71	14.3739	0.178758							TRUE	0.647241	TRUE	3	8	1		N
B1	PH7.4 Md	Miro-1	UNKNOWN	SYBR	None	0.624193	0.575722	0.676745	24.5663	24.5104	0.0999763		9.75995	0.0523395			0.679937	TRUE	0.593374	TRUE	3	19	1		N
B2	PH7.4 Md	Miro-1	UNKNOWN	SYBR	None	0.624193	0.575722	0.676745	24.3334	24.5104	0.0999763		9.75995	0.0523395			0.679937	TRUE	0.593374	TRUE	3	18	1		N
B3	PH7.4 Md	Miro-1	UNKNOWN	SYBR	None	0.624193	0.575722	0.676745	24.4964	24.5104	0.0999763		9.75995	0.0523395			0.679937	TRUE	0.593374	TRUE	3	18	1		N
B4	PH7.4 Md	Miro-1	UNKNOWN	SYBR	None	0.624193	0.575722	0.676745	24.5052	24.5104	0.0999763		9.75995	0.0523395			0.679937	TRUE	0.593374	TRUE	3	18	1		N
B5	PH7.4 Md	Miro-1	UNKNOWN	SYBR	None	0.624193	0.575722	0.676745	24.6327	24.5104	0.0999763		9.75995	0.0523395			0.679937	TRUE	0.593374	TRUE	3	18	1		N
B6	PH7.4 Md	Miro-1	UNKNOWN	SYBR	None	0.624193	0.575722	0.676745	24.5282	24.5104	0.0999763		9.75995	0.0523395			0.679937	TRUE	0.593374	TRUE	3	18	1		N
B7	PH7.4 Md	mbactin	UNKNOWN	SYBR	None				14.8398	14.7504	0.0802577							TRUE	0.647241	TRUE	3	8	1		N
B8	PH7.4 Md	mbactin	UNKNOWN	SYBR	None				14.6491	14.7504	0.0802577							TRUE	0.647241	TRUE	3	8	1		N
B9	PH7.4 Md	mbactin	UNKNOWN	SYBR	None				14.7485	14.7504	0.0802577							TRUE	0.647241	TRUE	3	8	1		N
B10	PH7.4 Md	mbactin	UNKNOWN	SYBR	None				14.6737	14.7504	0.0802577							TRUE	0.647241	TRUE	3	8	1		N
B11	PH7.4 Md	mbactin	UNKNOWN	SYBR	None				14.7513	14.7504	0.0802577							TRUE	0.647241	TRUE	3	8	1		N
B12	PH7.4 Md	mbactin	UNKNOWN	SYBR	None				14.8402	14.7504	0.0802577							TRUE	0.647241	TRUE	3	8	1		N
C1	PH7.4	Miro-1	UNKNOWN	SYBR	None	0.795816	0.717662	0.882481	23.7097	23.7529	0.103		9.4095	0.0669305			0.329494	TRUE	0.593374	TRUE	3	18	1		N
C2	PH7.4	Miro-1	UNKNOWN	SYBR	None	0.795816	0.717662	0.882481	23.6609	23.7529	0.103		9.4095	0.0669305			0.329494	TRUE	0.593374	TRUE	3	18	1		N
C3	PH7.4	Miro-1	UNKNOWN	SYBR	None	0.795816	0.717662	0.882481	23.7677	23.7529	0.103		9.4095	0.0669305			0.329494	TRUE	0.593374	TRUE	3	18	1		N
C4	PH7.4	Miro-1	UNKNOWN	SYBR	None	0.795816	0.717662	0.882481	23.6615	23.7529	0.103		9.4095	0.0669305			0.329494	TRUE	0.593374	TRUE	3	18	1		N
C5	PH7.4	Miro-1	UNKNOWN	SYBR	None	0.795816	0.717662	0.882481	23.782	23.7529	0.103		9.4095	0.0669305			0.329494	TRUE	0.593374	TRUE	3	17	1		N
C6	PH7.4	Miro-1	UNKNOWN	SYBR	None	0.795816	0.717662	0.882481	23.9353	23.7529	0.103		9.4095	0.0669305			0.329494	TRUE	0.593374	TRUE	3	17	1		N
C7	PH7.4	mbactin	UNKNOWN	SYBR	None				14.4545	14.3434	0.127551							TRUE	0.647241	TRUE	3	7	1		N
C8	PH7.4	mbactin	UNKNOWN	SYBR	None				14.1203	14.3434	0.127551							TRUE	0.647241	TRUE	3	7	1		N
C9	PH7.4	mbactin	UNKNOWN	SYBR	None				14.2749	14.3434	0.127551							TRUE	0.647241	TRUE	3	7	1		N
C10	PH7.4	mbactin	UNKNOWN	SYBR	None				14.4023	14.3434	0.127551							TRUE	0.647241	TRUE	3	8	1		N
C11	PH7.4	mbactin	UNKNOWN	SYBR	None				14.4471	14.3434	0.127551							TRUE	0.647241	TRUE	3	7	1		N
C12	PH7.4	mbactin	UNKNOWN	SYBR	None				14.361	14.3434	0.127551							TRUE	0.647241	TRUE	3	7	1		N
D1	PH6.5 Md	Miro-1	UNKNOWN	SYBR	None	0.89853	0.847236	0.952929	24.0875	24.1139	0.0630538		9.23437	0.0380597			0.154362	TRUE	0.593374	TRUE	3	18	1		N
D2	PH6.5 Md	Miro-1	UNKNOWN	SYBR	None	0.89853	0.847236	0.952929	24.1759	24.1139	0.0630538		9.23437	0.0380597			0.154362	TRUE	0.593374	TRUE	3	18	1		N
D3	PH6.5 Md	Miro-1	UNKNOWN	SYBR	None	0.89853	0.847236	0.952929	24.1095	24.1139	0.0630538		9.23437	0.0380597			0.154362	TRUE	0.593374	TRUE	3	18	1		N
D4	PH6.5 Md	Miro-1	UNKNOWN	SYBR	None	0.89853	0.847236	0.952929	24.0076	24.1139	0.0630538		9.23437	0.0380597			0.154362	TRUE	0.593374	TRUE	3	18	1		N
D5	PH6.5 Md	Miro-1	UNKNOWN	SYBR	None	0.89853	0.847236	0.952929	24.1275	24.1139	0.0630538		9.23437	0.0380597			0.154362	TRUE	0.593374	TRUE	3	18	1		N
D6	PH6.5 Md	Miro-1	UNKNOWN	SYBR	None	0.89853	0.847236	0.952929	24.1757	24.1139	0.0630538		9.23437	0.0380597			0.154362	TRUE	0.593374	TRUE	3	17	1		N
D7	PH6.5 Md	mbactin	UNKNOWN	SYBR	None				14.9412	14.8796	0.0686692							TRUE	0.647241	TRUE	3	8	1		N
D8	PH6.5 Md	mbactin	UNKNOWN	SYBR	None				14.8012	14.8796	0.0686692							TRUE	0.647241	TRUE	3	8	1		N
D9	PH6.5 Md	mbactin	UNKNOWN	SYBR	None				14.9409	14.8796	0.0686692							TRUE	0.647241	TRUE	3	8	1		N
D10	PH6.5 Md	mbactin	UNKNOWN	SYBR	None				14.7867	14.8796	0.0686692							TRUE	0.647241	TRUE	3	8	1		N
D11	PH6.5 Md	mbactin	UNKNOWN	SYBR	None				14.8971	14.8796	0.0686692							TRUE	0.647241	TRUE	3	7	1		N
D12	PH6.5 Md	mbactin	UNKNOWN	SYBR	None				14.9103	14.8796	0.0686692							TRUE	0.647241	TRUE	3	8	1		N
Analysis Type	Singleplex
Endogenous Control	mbactin
RQ Min/Max Confidence Level	95.0
Reference Sample

## Sheet: 最终结果
Well	Sample Name	Target Name	Cт
A1	PH6.5	Miro-1	23.4859					A7	PH6.5	mbactin	14.3083
A2	PH6.5	Miro-1	23.4318	23.4588	-0.226467	1.16997		A8	PH6.5	mbactin	14.176	14.2422
A3	PH6.5	Miro-1	23.4454					A9	PH6.5	mbactin	14.3353
A4	PH6.5	Miro-1	23.3685	23.407	-0.307633	1.23768		A10	PH6.5	mbactin	14.3824	14.3589
A5	PH6.5	Miro-1	23.5725					A11	PH6.5	mbactin	14.3315
A6	PH6.5	Miro-1	23.4196	23.496	-0.362647	1.28578		A12	PH6.5	mbactin	14.71	14.5208
B1	PH7.4 Md	Miro-1	24.5663					B7	PH7.4 Md	mbactin	14.8398
B2	PH7.4 Md	Miro-1	24.3334	24.4498	0.764548	0.588638		B8	PH7.4 Md	mbactin	14.6491	14.7444
B3	PH7.4 Md	Miro-1	24.4964					B9	PH7.4 Md	mbactin	14.7485
B4	PH7.4 Md	Miro-1	24.5052	24.5008	0.786203	0.579868		B10	PH7.4 Md	mbactin	14.6737	14.7111
B5	PH7.4 Md	Miro-1	24.6327					B11	PH7.4 Md	mbactin	14.7513
B6	PH7.4 Md	Miro-1	24.5282	24.5805	0.721792	0.606344		B12	PH7.4 Md	mbactin	14.8402	14.7957
C1	PH7.4	Miro-1	23.7097					C7	PH7.4	mbactin	14.4545
C2	PH7.4	Miro-1	23.6609	23.6853		1		C8	PH7.4	mbactin	14.1203	14.2874
C3	PH7.4	Miro-1	23.7677					C9	PH7.4	mbactin	14.2749
C4	PH7.4	Miro-1	23.6615	23.7146		1		C10	PH7.4	mbactin	14.4023	14.3386
C5	PH7.4	Miro-1	23.782					C11	PH7.4	mbactin	14.4471
C6	PH7.4	Miro-1	23.9353	23.8587		1		C12	PH7.4	mbactin	14.361	14.4041
D1	PH6.5 Md	Miro-1	24.0875					D7	PH6.5 Md	mbactin	14.9412
D2	PH6.5 Md	Miro-1	24.1759	24.1317	0.446379	0.733883		D8	PH6.5 Md	mbactin	14.8012	14.8712
D3	PH6.5 Md	Miro-1	24.1095					D9	PH6.5 Md	mbactin	14.9409
D4	PH6.5 Md	Miro-1	24.0076	24.0585	0.343926	0.787894		D10	PH6.5 Md	mbactin	14.7867	14.8638
D5	PH6.5 Md	Miro-1	24.1275					D11	PH6.5 Md	mbactin	14.8971
D6	PH6.5 Md	Miro-1	24.1757	24.1516	0.292937	0.816239		D12	PH6.5 Md	mbactin	14.9103	14.9037
