# Supplementary material for: Neurons Release Injured Mitochondria as “Help-Me” Signaling After Ischemic Stroke
Source: Front Aging Neurosci. 2022 Mar 3;14:785761. doi: 10.3389/fnagi.2022.785761 (PMC8926840; doi:10.3389/fnagi.2022.785761)
Supplement: Supplementary file 3 [file Table_3.XLS]

## Sheet: Results
Block Type	96well
Chemistry	SYBR_GREEN
Experiment Run End Time	2021-12-11 15:35:38 PM CST
Instrument Type	steponeplus
Passive Reference	ROX
Well	Sample Name	Target Name	Task	Reporter	Quencher	RQ	RQ Min	RQ Max	Cт	Cт Mean	Cт SD	ΔCт	ΔCт Mean	ΔCт SE	HK Control ΔCт Mean	HK Control ΔCт SE	ΔΔCт	Automatic Ct Threshold	Ct Threshold	Automatic Baseline	Baseline Start	Baseline End	Efficiency	Comments	HIGHSD	OUTLIERRG	EXPFAIL
A1	PH7.4 Md	TFAM	UNKNOWN	SYBR	None	1	0.721201	1.38658	32.5501	32.2258	0.287593		6.30294	0.169831			0	TRUE	0.39608	TRUE	3	27	1		N	N	N
A2	PH7.4 Md	TFAM	UNKNOWN	SYBR	None	1	0.721201	1.38658	32.0017	32.2258	0.287593		6.30294	0.169831			0	TRUE	0.39608	TRUE	3	26	1		N	N	N
A3	PH7.4 Md	TFAM	UNKNOWN	SYBR	None	1	0.721201	1.38658	32.1257	32.2258	0.287593		6.30294	0.169831			0	TRUE	0.39608	TRUE	3	26	1		N	N	N
A4	PH7.4 Md	TFAM	UNKNOWN	SYBR	None	1	0.568818	1.75803	30.7325	30.8881	0.504006		4.96518	0.293167			0	TRUE	0.684552	TRUE	3	23	1		Y	N	N
A5	PH7.4 Md	TFAM	UNKNOWN	SYBR	None	1	0.568818	1.75803	31.4515	30.8881	0.504006		4.96518	0.293167			0	TRUE	0.684552	TRUE	3	24	1		Y	N	N
A6	PH7.4 Md	TFAM	UNKNOWN	SYBR	None	1	0.568818	1.75803	30.4802	30.8881	0.504006		4.96518	0.293167			0	TRUE	0.684552	TRUE	3	24	1		Y	N	N
A7	PH6.5 Md	TFAM	UNKNOWN	SYBR	None	1	0.926065	1.07984	31.8832	31.8515	0.030993		5.92864	0.0399127			0	TRUE	0.49821	TRUE	3	26	1		N	N	N
A8	PH6.5 Md	TFAM	UNKNOWN	SYBR	None	1	0.926065	1.07984	31.8501	31.8515	0.030993		5.92864	0.0399127			0	TRUE	0.49821	TRUE	3	26	1		N	N	N
A9	PH6.5 Md	TFAM	UNKNOWN	SYBR	None	1	0.926065	1.07984	31.8213	31.8515	0.030993		5.92864	0.0399127			0	TRUE	0.49821	TRUE	3	25	1		N	N	N
A10	PH7.4 Md	TFAM	UNKNOWN	SYBR	None				25.8849	25.9229	0.061794							TRUE	0.264662	TRUE	3	21	1		N	N	N
A11	PH7.4 Md	TFAM	UNKNOWN	SYBR	None				25.8896	25.9229	0.061794							TRUE	0.264662	TRUE	3	21	1		N	N	N
A12	PH7.4 Md	TFAM	UNKNOWN	SYBR	None				25.9942	25.9229	0.061794							TRUE	0.264662	TRUE	3	21	1		N	N	N
C1	PH7.4	TFAM	UNKNOWN	SYBR	None	2.59462	1.77451	3.79376	33.0677	32.9578	0.111675		4.92741	0.197412			-1.37552	TRUE	0.39608	TRUE	3	27	1		N	N	N
C2	PH7.4	TFAM	UNKNOWN	SYBR	None	2.59462	1.77451	3.79376	32.8444	32.9578	0.111675		4.92741	0.197412			-1.37552	TRUE	0.39608	TRUE	3	27	1		N	N	N
C3	PH7.4	TFAM	UNKNOWN	SYBR	None	2.59462	1.77451	3.79376	32.9614	32.9578	0.111675		4.92741	0.197412			-1.37552	TRUE	0.39608	TRUE	3	27	1		N	N	N
C4	PH7.4	TFAM	UNKNOWN	SYBR	None	1.6504	1.01277	2.68949	32.0868	32.2728	0.297859		4.24236	0.253747			-0.722818	TRUE	0.684552	TRUE	3	25	1		N	N	N
C5	PH7.4	TFAM	UNKNOWN	SYBR	None	1.6504	1.01277	2.68949	32.6163	32.2728	0.297859		4.24236	0.253747			-0.722818	TRUE	0.684552	TRUE	3	25	1		N	N	N
C6	PH7.4	TFAM	UNKNOWN	SYBR	None	1.6504	1.01277	2.68949	32.1153	32.2728	0.297859		4.24236	0.253747			-0.722818	TRUE	0.684552	TRUE	3	25	1		N	N	N
C10	PH7.4	mbactin	UNKNOWN	SYBR	None				28.3831	28.0304	0.323176							TRUE	0.264662	TRUE	3	23	1		N	N	N
C11	PH7.4	mbactin	UNKNOWN	SYBR	None				27.7485	28.0304	0.323176							TRUE	0.264662	TRUE	3	21	1		N	N	N
C12	PH7.4	mbactin	UNKNOWN	SYBR	None				27.9596	28.0304	0.323176							TRUE	0.264662	TRUE	3	23	1		N	N	N
D1	PH6.5 Md	TFAM	UNKNOWN	SYBR	None	2.34732	1.32786	4.14947	32.5813	32.722	0.194463		5.07192	0.29603			-1.23102	TRUE	0.39608	TRUE	3	24	1		N	N	N
D2	PH6.5 Md	TFAM	UNKNOWN	SYBR	None	2.34732	1.32786	4.14947	32.6407	32.722	0.194463		5.07192	0.29603			-1.23102	TRUE	0.39608	TRUE	3	23	1		N	N	N
D3	PH6.5 Md	TFAM	UNKNOWN	SYBR	None	2.34732	1.32786	4.14947	32.9439	32.722	0.194463		5.07192	0.29603			-1.23102	TRUE	0.39608	TRUE	3	23	1		N	N	N
D4	PH7.4 MD	TFAM	UNKNOWN	SYBR	None	1.52572	0.804066	2.89506	32.3563	32.0057	0.3275		4.35569	0.332837			-0.609489	TRUE	0.684552	TRUE	3	17	1		N	N	N
D5	PH7.4 MD	TFAM	UNKNOWN	SYBR	None	1.52572	0.804066	2.89506	31.7077	32.0057	0.3275		4.35569	0.332837			-0.609489	TRUE	0.684552	TRUE	3	16	1		N	N	N
D6	PH7.4 MD	TFAM	UNKNOWN	SYBR	None	1.52572	0.804066	2.89506	31.9533	32.0057	0.3275		4.35569	0.332837			-0.609489	TRUE	0.684552	TRUE	3	16	1		N	N	N
D7	PH7.4 MD	TFAM	UNKNOWN	SYBR	None	0.658655	0.232398	1.86674	33.4748	34.1811	0.808685		6.53104	0.541312			0.602405	TRUE	0.49821	TRUE	3	23	1		Y	N	N
D8	PH7.4 MD	TFAM	UNKNOWN	SYBR	None	0.658655	0.232398	1.86674	35.0632	34.1811	0.808685		6.53104	0.541312			0.602405	TRUE	0.49821	TRUE	3	23	1		Y	N	N
D9	PH7.4 MD	TFAM	UNKNOWN	SYBR	None	0.658655	0.232398	1.86674	34.0052	34.1811	0.808685		6.53104	0.541312			0.602405	TRUE	0.49821	TRUE	3	23	1		Y	N	N
D10	PH7.4 MD	mbactin	UNKNOWN	SYBR	None				27.925	27.6501	0.474431							TRUE	0.264662	TRUE	3	21	1		N	N	N
D11	PH7.4 MD	mbactin	UNKNOWN	SYBR	None				27.1022	27.6501	0.474431							TRUE	0.264662	TRUE	3	17	1		N	Y	N
D12	PH7.4 MD	mbactin	UNKNOWN	SYBR	None				27.923	27.6501	0.474431							TRUE	0.264662	TRUE	3	16	1		N	N	N
E7	PH6.5	TFAM	UNKNOWN	SYBR	None	2.27803	1.31323	3.95164	33.6116	33.8569	0.346988		4.74085	0.249703			-1.18779	TRUE	0.49821	TRUE	3	27	1		N	N	N
E8	PH6.5	TFAM	UNKNOWN	SYBR	None				Undetermined	33.8569	0.346988							TRUE	0.49821	TRUE	3	33	1		N	N	N
E9	PH6.5	TFAM	UNKNOWN	SYBR	None	2.27803	1.31323	3.95164	34.1023	33.8569	0.346988		4.74085	0.249703			-1.18779	TRUE	0.49821	TRUE	3	28	1		N	N	N
E10	PH6.5	mbactin	UNKNOWN	SYBR	None				29.1239	29.1161	0.0803337							TRUE	0.264662	TRUE	3	24	1		N	N	N
E11	PH6.5	mbactin	UNKNOWN	SYBR	None				29.1922	29.1161	0.0803337							TRUE	0.264662	TRUE	3	24	1		N	N	N
E12	PH6.5	mbactin	UNKNOWN	SYBR	None				29.0321	29.1161	0.0803337							TRUE	0.264662	TRUE	3	24	1		N	N	N
F1	PH6.5	TFAM	UNKNOWN	SYBR	None	14.1825	7.05303	28.5186	32.3969	32.5549	0.175128		2.4769	0.36298			-3.82604	TRUE	0.39608	TRUE	3	27	1		N	N	N
F2	PH6.5	TFAM	UNKNOWN	SYBR	None	14.1825	7.05303	28.5186	32.5246	32.5549	0.175128		2.4769	0.36298			-3.82604	TRUE	0.39608	TRUE	3	27	1		N	N	N
F3	PH6.5	TFAM	UNKNOWN	SYBR	None	14.1825	7.05303	28.5186	32.7432	32.5549	0.175128		2.4769	0.36298			-3.82604	TRUE	0.39608	TRUE	3	27	1		N	N	N
F4	PH6.5	TFAM	UNKNOWN	SYBR	None	4.80573	1.13212	20.3998	33.9065	32.7784	1.15257		2.70043	0.751222			-2.26475	TRUE	0.684552	TRUE	3	27	1		Y	N	N
F5	PH6.5	TFAM	UNKNOWN	SYBR	None	4.80573	1.13212	20.3998	32.8258	32.7784	1.15257		2.70043	0.751222			-2.26475	TRUE	0.684552	TRUE	3	26	1		Y	N	N
F6	PH6.5	TFAM	UNKNOWN	SYBR	None	4.80573	1.13212	20.3998	31.6029	32.7784	1.15257		2.70043	0.751222			-2.26475	TRUE	0.684552	TRUE	3	25	1		Y	N	N
Analysis Type	Singleplex
Endogenous Control	mbactin
RQ Min/Max Confidence Level	95.0
Reference Sample

## Sheet: 最终结果1
Block Type	96well
Chemistry	SYBR_GREEN
Experiment Run End Time	2021-12-11 15:35:38 PM CST
Instrument Type	steponeplus
Passive Reference	ROX
Well	Sample Name	Target Name	Cт
C1	PH7.4	TFAM	33.0677						C10	PH7.4	mbactin	28.3831
C2	PH7.4	TFAM	32.8444						C11	PH7.4	mbactin	27.7485
C3	PH7.4	TFAM	32.9614	32.9578	4.92741		1		C12	PH7.4	mbactin	27.9596	28.0304
A1	PH7.4 MD	TFAM	32.5501						A10	PH7.4 MD	mbactin	25.8849
A2	PH7.4 MD	TFAM	32.0017						A11	PH7.4 MD	mbactin	25.8896
A3	PH7.4 MD	TFAM	32.1257	32.2258	6.30294	1.37552	0.385413		A12	PH7.4 MD	mbactin	25.9942	25.9229
F1	PH6.5	TFAM	32.3969						F10	PH6.5	mbactin	30.0655
F2	PH6.5	TFAM	32.5246						F11	PH6.5	mbactin	30.688
F3	PH6.5	TFAM	32.7432	32.5549	2.4769	-2.45051	5.46611		F12	PH6.5	mbactin	29.4805	30.078
D1	PH6.5 MD	TFAM	32.5813						D10	PH6.5 MD	mbactin	27.925
D2	PH6.5 MD	TFAM	32.6407						D11	PH6.5 MD	mbactin	27.1022
D3	PH6.5 MD	TFAM	32.9439	32.722	5.07192	0.144509	0.904687		D12	PH6.5 MD	mbactin	27.923	27.6501
Analysis Type	Singleplex
Endogenous Control	mbactin
RQ Min/Max Confidence Level	95.0
Reference Sample

## Sheet: 最终结果2
Block Type	96well
Chemistry	SYBR_GREEN
Experiment Run End Time	2021-12-11 15:35:38 PM CST
Instrument Type	steponeplus
Passive Reference	ROX
Well	Sample Name	Target Name	Cт
C4	PH7.4	TFAM	32.0868					C10	PH7.4	mbactin	28.3831
C5	PH7.4	TFAM	32.6163					C11	PH7.4	mbactin	27.7485
C6	PH7.4	TFAM	32.1153	32.2728	4.24236		1	C12	PH7.4	mbactin	27.9596	28.0304
A4	PH7.4 MD	TFAM	30.7325					A10	PH7.4 MD	mbactin	25.8849
A5	PH7.4 MD	TFAM	31.4515					A11	PH7.4 MD	mbactin	25.8896
A6	PH7.4 MD	TFAM	30.4802	30.8881	4.96518	0.722818	0.605913	A12	PH7.4 MD	mbactin	25.9942	25.9229
F4	PH6.5	TFAM	33.9065					F10	PH6.5	mbactin	30.0655
F5	PH6.5	TFAM	32.8258					F11	PH6.5	mbactin	30.688
F6	PH6.5	TFAM	31.6029	32.7784	2.70043	-1.54194	2.91185	F12	PH6.5	mbactin	29.4805	30.078
D4	PH6.5 MD	TFAM	32.3563					D10	PH6.5 MD	mbactin	27.925
D5	PH6.5 MD	TFAM	31.7077					D11	PH6.5 MD	mbactin	27.1022
D6	PH6.5 MD	TFAM	31.9533	32.0057	4.35569	0.113329	0.924452	D12	PH6.5 MD	mbactin	27.923	27.6501
Analysis Type	Singleplex
Endogenous Control	mbactin
RQ Min/Max Confidence Level	95.0
Reference Sample

## Sheet: 最终结果3
Block Type	96well
Chemistry	SYBR_GREEN
Experiment Run End Time	2021-12-11 15:35:38 PM CST
Instrument Type	steponeplus
Passive Reference	ROX
Well	Sample Name	Target Name	Cт
C7	PH7.4	TFAM	32.7949					C10	PH7.4	mbactin	28.3831
C8	PH7.4	TFAM	34.3404					C11	PH7.4	mbactin	27.7485
C9	PH7.4	TFAM	34.2532	33.7961	5.76571		1	C12	PH7.4	mbactin	27.9596	28.0304
D7	PH7.4 MD	TFAM	33.4748					D10	PH7.4 MD	mbactin	27.925
D8	PH7.4 MD	TFAM	35.0632					D11	PH7.4 MD	mbactin	27.1022
D9	PH7.4 MD	TFAM	34.0052	34.1811	6.53104	0.765335	0.588317	D12	PH7.4 MD	mbactin	27.923	27.6501
E7	PH6.5	TFAM	33.6116					E10	PH6.5	mbactin	29.1239
E8	PH6.5	TFAM	33.3216					E11	PH6.5	mbactin	29.1922
E9	PH6.5	TFAM	34.1023	33.6785	4.5624	-1.20331	2.30267	E12	PH6.5	mbactin	29.0321	29.1161
A7	PH6.5 MD	TFAM	31.8832					A10	PH6.5 MD	mbactin	25.8849
A8	PH6.5 MD	TFAM	31.8501					A11	PH6.5 MD	mbactin	25.8896
A9	PH6.5 MD	TFAM	31.8213	31.8515	5.92864	0.16293	0.893209	A12	PH6.5 MD	mbactin	25.9942	25.9229
Analysis Type	Singleplex
Endogenous Control	mbactin
RQ Min/Max Confidence Level	95.0
Reference Sample
