# Supplementary material for: Neurons Release Injured Mitochondria as “Help-Me” Signaling After Ischemic Stroke
Source: Front Aging Neurosci. 2022 Mar 3;14:785761. doi: 10.3389/fnagi.2022.785761 (PMC8926840; doi:10.3389/fnagi.2022.785761)
Supplement: Supplementary file 4 [file Table_4.XLS]

## Sheet: Sample Setup
Block Type	96well
Chemistry	SYBR_GREEN
Experiment Run End Time	2021-12-20 11:43:24 AM CST
Instrument Type	steponeplus
Passive Reference	ROX
Well	Sample Name	Sample Color	Biogroup Name	Biogroup Color	Target Name	Target Color	Task	Reporter	Quencher	Comments
A1	PH6.5	RGB(132,193,241)			TFAM	RGB(139,189,249)	UNKNOWN	SYBR	None
A2	PH6.5	RGB(132,193,241)			TFAM	RGB(139,189,249)	UNKNOWN	SYBR	None
A3	PH6.5	RGB(132,193,241)			TFAM	RGB(139,189,249)	UNKNOWN	SYBR	None
A4	PH6.5	RGB(132,193,241)			TFAM	RGB(139,189,249)	UNKNOWN	SYBR	None
A5	PH6.5	RGB(132,193,241)			TFAM	RGB(139,189,249)	UNKNOWN	SYBR	None
A7	PH6.5	RGB(132,193,241)			mbactin	RGB(208,243,98)	UNKNOWN	SYBR	None
A8	PH6.5	RGB(132,193,241)			mbactin	RGB(208,243,98)	UNKNOWN	SYBR	None
A9	PH6.5	RGB(132,193,241)			mbactin	RGB(208,243,98)	UNKNOWN	SYBR	None
A10	PH6.5	RGB(132,193,241)			mbactin	RGB(208,243,98)	UNKNOWN	SYBR	None
A11	PH6.5	RGB(132,193,241)			mbactin	RGB(208,243,98)	UNKNOWN	SYBR	None
B1	ph7.4	RGB(168,255,222)			TFAM	RGB(139,189,249)	UNKNOWN	SYBR	None
B2	ph7.4	RGB(168,255,222)			TFAM	RGB(139,189,249)	UNKNOWN	SYBR	None
B3	ph7.4	RGB(168,255,222)			TFAM	RGB(139,189,249)	UNKNOWN	SYBR	None
B4	ph7.4	RGB(168,255,222)			TFAM	RGB(139,189,249)	UNKNOWN	SYBR	None
B5	ph7.4	RGB(168,255,222)			TFAM	RGB(139,189,249)	UNKNOWN	SYBR	None
B7	ph7.4	RGB(168,255,222)			mbactin	RGB(208,243,98)	UNKNOWN	SYBR	None
B8	ph7.4	RGB(168,255,222)			mbactin	RGB(208,243,98)	UNKNOWN	SYBR	None
B9	ph7.4	RGB(168,255,222)			mbactin	RGB(208,243,98)	UNKNOWN	SYBR	None
B10	ph7.4	RGB(168,255,222)			mbactin	RGB(208,243,98)	UNKNOWN	SYBR	None
B11	ph7.4	RGB(168,255,222)			mbactin	RGB(208,243,98)	UNKNOWN	SYBR	None
C1	PH7.4 Md	RGB(223,221,142)			TFAM	RGB(139,189,249)	UNKNOWN	SYBR	None
C2	PH7.4 Md	RGB(223,221,142)			TFAM	RGB(139,189,249)	UNKNOWN	SYBR	None
C3	PH7.4 Md	RGB(223,221,142)			TFAM	RGB(139,189,249)	UNKNOWN	SYBR	None
C4	PH7.4 Md	RGB(223,221,142)			TFAM	RGB(139,189,249)	UNKNOWN	SYBR	None
C5	PH7.4 Md	RGB(223,221,142)			TFAM	RGB(139,189,249)	UNKNOWN	SYBR	None
C7	PH7.4 Md	RGB(223,221,142)			mbactin	RGB(208,243,98)	UNKNOWN	SYBR	None
C8	PH7.4 Md	RGB(223,221,142)			mbactin	RGB(208,243,98)	UNKNOWN	SYBR	None
C9	PH7.4 Md	RGB(223,221,142)			mbactin	RGB(208,243,98)	UNKNOWN	SYBR	None
C10	PH7.4 Md	RGB(223,221,142)			mbactin	RGB(208,243,98)	UNKNOWN	SYBR	None
C11	PH7.4 Md	RGB(223,221,142)			mbactin	RGB(208,243,98)	UNKNOWN	SYBR	None
D1	PH6.5 Md	RGB(247,255,168)			TFAM	RGB(139,189,249)	UNKNOWN	SYBR	None
D2	PH6.5 Md	RGB(247,255,168)			TFAM	RGB(139,189,249)	UNKNOWN	SYBR	None
D3	PH6.5 Md	RGB(247,255,168)			TFAM	RGB(139,189,249)	UNKNOWN	SYBR	None
D4	PH6.5 Md	RGB(247,255,168)			TFAM	RGB(139,189,249)	UNKNOWN	SYBR	None
D5	PH6.5 Md	RGB(247,255,168)			TFAM	RGB(139,189,249)	UNKNOWN	SYBR	None
D7	PH6.5 Md	RGB(247,255,168)			mbactin	RGB(208,243,98)	UNKNOWN	SYBR	None
D8	PH6.5 Md	RGB(247,255,168)			mbactin	RGB(208,243,98)	UNKNOWN	SYBR	None
D9	PH6.5 Md	RGB(247,255,168)			mbactin	RGB(208,243,98)	UNKNOWN	SYBR	None
D10	PH6.5 Md	RGB(247,255,168)			mbactin	RGB(208,243,98)	UNKNOWN	SYBR	None
D11	PH6.5 Md	RGB(247,255,168)			mbactin	RGB(208,243,98)	UNKNOWN	SYBR	None

## Sheet: Results
Block Type	96well
Chemistry	SYBR_GREEN
Experiment Run End Time	2021-12-20 11:43:24 AM CST
Instrument Type	steponeplus
Passive Reference	ROX
Well	Sample Name	Target Name	Task	Reporter	Quencher	RQ	RQ Min	RQ Max	Cт	Cт Mean	Cт SD	ΔCт	ΔCт Mean	ΔCт SE	HK Control ΔCт Mean	HK Control ΔCт SE	ΔΔCт	Automatic Ct Threshold	Ct Threshold	Automatic Baseline	Baseline Start	Baseline End	Efficiency	Comments	HIGHSD	OUTLIERRG
A1	PH6.5	TFAM	UNKNOWN	SYBR	None	0.00530667	0.00444515	0.00633516	25.2247	25.3086	0.233351		7.49021	0.11083			7.55798	TRUE	0.77653	TRUE	3	19	1		N	N
A2	PH6.5	TFAM	UNKNOWN	SYBR	None	0.00530667	0.00444515	0.00633516	25.2387	25.3086	0.233351		7.49021	0.11083			7.55798	TRUE	0.77653	TRUE	3	18	1		N	N
A3	PH6.5	TFAM	UNKNOWN	SYBR	None	0.00530667	0.00444515	0.00633516	25.4095	25.3086	0.233351		7.49021	0.11083			7.55798	TRUE	0.77653	TRUE	3	19	1		N	N
A4	PH6.5	TFAM	UNKNOWN	SYBR	None	0.00530667	0.00444515	0.00633516	25.6466	25.3086	0.233351		7.49021	0.11083			7.55798	TRUE	0.77653	TRUE	3	19	1		N	N
A5	PH6.5	TFAM	UNKNOWN	SYBR	None	0.00530667	0.00444515	0.00633516	25.0233	25.3086	0.233351		7.49021	0.11083			7.55798	TRUE	0.77653	TRUE	3	19	1		N	N
A7	PH6.5	mbactin	UNKNOWN	SYBR	None				17.7732	17.8183	0.083452							TRUE	0.776292	TRUE	3	12	1		N	N
A8	PH6.5	mbactin	UNKNOWN	SYBR	None				17.9523	17.8183	0.083452							TRUE	0.776292	TRUE	3	11	1		N	N
A9	PH6.5	mbactin	UNKNOWN	SYBR	None				17.7471	17.8183	0.083452							TRUE	0.776292	TRUE	3	11	1		N	N
A10	PH6.5	mbactin	UNKNOWN	SYBR	None				17.7731	17.8183	0.083452							TRUE	0.776292	TRUE	3	11	1		N	N
A11	PH6.5	mbactin	UNKNOWN	SYBR	None				17.846	17.8183	0.083452							TRUE	0.776292	TRUE	3	12	1		N	N
B1	PH7.4	TFAM	UNKNOWN	SYBR	None	0.003533	0.00305493	0.00408589	26.8353	26.8068	0.101558		8.07712	0.0909608			8.14489	TRUE	0.77653	TRUE	3	19	1		N	N
B2	PH7.4	TFAM	UNKNOWN	SYBR	None	0.003533	0.00305493	0.00408589	26.7087	26.8068	0.101558		8.07712	0.0909608			8.14489	TRUE	0.77653	TRUE	3	20	1		N	N
B3	PH7.4	TFAM	UNKNOWN	SYBR	None	0.003533	0.00305493	0.00408589	26.7569	26.8068	0.101558		8.07712	0.0909608			8.14489	TRUE	0.77653	TRUE	3	21	1		N	N
B4	PH7.4	TFAM	UNKNOWN	SYBR	None	0.003533	0.00305493	0.00408589	26.9695	26.8068	0.101558		8.07712	0.0909608			8.14489	TRUE	0.77653	TRUE	3	20	1		N	N
B5	PH7.4	TFAM	UNKNOWN	SYBR	None	0.003533	0.00305493	0.00408589	26.7638	26.8068	0.101558		8.07712	0.0909608			8.14489	TRUE	0.77653	TRUE	3	21	1		N	N
B7	PH7.4	mbactin	UNKNOWN	SYBR	None				18.8953	18.7297	0.176225							TRUE	0.776292	TRUE	3	12	1		N	N
B8	PH7.4	mbactin	UNKNOWN	SYBR	None				18.8513	18.7297	0.176225							TRUE	0.776292	TRUE	3	12	1		N	N
B9	PH7.4	mbactin	UNKNOWN	SYBR	None				18.7337	18.7297	0.176225							TRUE	0.776292	TRUE	3	12	1		N	N
B10	PH7.4	mbactin	UNKNOWN	SYBR	None				18.725	18.7297	0.176225							TRUE	0.776292	TRUE	3	12	1		N	N
B11	PH7.4	mbactin	UNKNOWN	SYBR	None				18.4434	18.7297	0.176225							TRUE	0.776292	TRUE	3	12	1		N	N
C1	PH7.4 Md	TFAM	UNKNOWN	SYBR	None	0.00249036	0.00207424	0.00298994	26.1259	26.024	0.24623		8.58167	0.114382			8.64943	TRUE	0.77653	TRUE	3	18	1		N	N
C2	PH7.4 Md	TFAM	UNKNOWN	SYBR	None	0.00249036	0.00207424	0.00298994	26.0946	26.024	0.24623		8.58167	0.114382			8.64943	TRUE	0.77653	TRUE	3	19	1		N	N
C3	PH7.4 Md	TFAM	UNKNOWN	SYBR	None	0.00249036	0.00207424	0.00298994	26.1684	26.024	0.24623		8.58167	0.114382			8.64943	TRUE	0.77653	TRUE	3	19	1		N	N
C4	PH7.4 Md	TFAM	UNKNOWN	SYBR	None	0.00249036	0.00207424	0.00298994	26.1446	26.024	0.24623		8.58167	0.114382			8.64943	TRUE	0.77653	TRUE	3	19	1		N	N
C5	PH7.4 Md	TFAM	UNKNOWN	SYBR	None	0.00249036	0.00207424	0.00298994	25.5861	26.024	0.24623		8.58167	0.114382			8.64943	TRUE	0.77653	TRUE	3	20	1		N	Y
C7	PH7.4 Md	mbactin	UNKNOWN	SYBR	None				17.3687	17.4423	0.0691894							TRUE	0.776292	TRUE	3	11	1		N	N
C8	PH7.4 Md	mbactin	UNKNOWN	SYBR	None				17.3653	17.4423	0.0691894							TRUE	0.776292	TRUE	3	11	1		N	N
C9	PH7.4 Md	mbactin	UNKNOWN	SYBR	None				17.5044	17.4423	0.0691894							TRUE	0.776292	TRUE	3	11	1		N	N
C10	PH7.4 Md	mbactin	UNKNOWN	SYBR	None				17.4836	17.4423	0.0691894							TRUE	0.776292	TRUE	3	11	1		N	N
C11	PH7.4 Md	mbactin	UNKNOWN	SYBR	None				17.4895	17.4423	0.0691894							TRUE	0.776292	TRUE	3	11	1		N	N
D1	PH6.5 Md	TFAM	UNKNOWN	SYBR	None	0.00420704	0.00356379	0.0049664	26.5337	26.5902	0.192788		7.82521	0.103813			7.89298	TRUE	0.77653	TRUE	3	20	1		N	N
D2	PH6.5 Md	TFAM	UNKNOWN	SYBR	None	0.00420704	0.00356379	0.0049664	26.5103	26.5902	0.192788		7.82521	0.103813			7.89298	TRUE	0.77653	TRUE	3	21	1		N	N
D3	PH6.5 Md	TFAM	UNKNOWN	SYBR	None	0.00420704	0.00356379	0.0049664	26.933	26.5902	0.192788		7.82521	0.103813			7.89298	TRUE	0.77653	TRUE	3	20	1		N	Y
D4	PH6.5 Md	TFAM	UNKNOWN	SYBR	None	0.00420704	0.00356379	0.0049664	26.4992	26.5902	0.192788		7.82521	0.103813			7.89298	TRUE	0.77653	TRUE	3	20	1		N	N
D5	PH6.5 Md	TFAM	UNKNOWN	SYBR	None	0.00420704	0.00356379	0.0049664	26.4749	26.5902	0.192788		7.82521	0.103813			7.89298	TRUE	0.77653	TRUE	3	20	1		N	N
D7	PH6.5 Md	mbactin	UNKNOWN	SYBR	None				18.6848	18.765	0.129302							TRUE	0.776292	TRUE	3	12	1		N	N
D8	PH6.5 Md	mbactin	UNKNOWN	SYBR	None				18.6679	18.765	0.129302							TRUE	0.776292	TRUE	3	13	1		N	N
D9	PH6.5 Md	mbactin	UNKNOWN	SYBR	None				18.9781	18.765	0.129302							TRUE	0.776292	TRUE	3	12	1		N	N
D10	PH6.5 Md	mbactin	UNKNOWN	SYBR	None				18.6973	18.765	0.129302							TRUE	0.776292	TRUE	3	13	1		N	N
D11	PH6.5 Md	mbactin	UNKNOWN	SYBR	None				18.797	18.765	0.129302							TRUE	0.776292	TRUE	3	13	1		N	N
Analysis Type	Singleplex
Endogenous Control	mbactin
RQ Min/Max Confidence Level	95.0
Reference Sample

## Sheet: 最终
Block Type	96well
Chemistry	SYBR_GREEN
Experiment Run End Time	2021-12-20 11:43:24 AM CST
Instrument Type	steponeplus
Passive Reference	ROX
Well	Sample Name	Target Name	Cт
A1	PH6.5	TFAM	25.2247					A7	PH6.5	mbactin	17.7732
A2	PH6.5	TFAM	25.2387	25.2317	7.36895	-0.529749	1.44368	A8	PH6.5	mbactin	17.9523	17.8627
A3	PH6.5	TFAM	25.4095					A9	PH6.5	mbactin	17.7471
A4	PH6.5	TFAM	25.6466	25.5281	7.76795	-0.365932	1.28871	A10	PH6.5	mbactin	17.7731	17.7601
A5	PH6.5	TFAM	25.0233					A11	PH6.5	mbactin	17.846
A6	PH6.5	TFAM	25.2233	25.1233	7.22725	-0.823194	1.76932	A12	PH6.5	mbactin	17.946	17.896
D1	PH6.5 Md	TFAM	26.5337					D7	PH6.5 Md	mbactin	18.6848
D2	PH6.5 Md	TFAM	26.5103	26.522	7.84567	-0.0530291	1.03744	D8	PH6.5 Md	mbactin	18.6679	18.6763
D3	PH6.5 Md	TFAM	26.933					D9	PH6.5 Md	mbactin	18.9781
D4	PH6.5 Md	TFAM	26.4992	26.7161	7.87842	-0.255464	1.19372	D10	PH6.5 Md	mbactin	18.6973	18.8377
D5	PH6.5 Md	TFAM	26.4749					D11	PH6.5 Md	mbactin	18.797
D6	PH6.5 Md	TFAM	26.5749	26.5249	7.71788	-0.332565	1.25925	D11	PH6.5 Md	mbactin	18.817	18.807
B1	PH7.4	TFAM	26.8353					B7	PH7.4	mbactin	18.8953
B2	PH7.4	TFAM	26.7087	26.772	7.8987	1	1	B8	PH7.4	mbactin	18.8513	18.8733
B3	PH7.4	TFAM	26.7569					B9	PH7.4	mbactin	18.7337
B4	PH7.4	TFAM	26.9695	26.8632	8.13388	1	1	B10	PH7.4	mbactin	18.725	18.7293
B5	PH7.4	TFAM	26.7638					B11	PH7.4	mbactin	18.4434
B6	PH7.4	TFAM	26.3238	26.5438	8.05045	1	1	B11	PH7.4	mbactin	18.5434	18.4934
C1	PH7.4 Md	TFAM	26.1259					C7	PH7.4 Md	mbactin	17.3687
C2	PH7.4 Md	TFAM	26.0946	26.1103	8.74331	0.844606	0.556863	C8	PH7.4 Md	mbactin	17.3653	17.367
C3	PH7.4 Md	TFAM	26.1684					C9	PH7.4 Md	mbactin	17.5044
C4	PH7.4 Md	TFAM	26.1446	26.1565	8.66255	0.528663	0.693197	C10	PH7.4 Md	mbactin	17.4836	17.494
C5	PH7.4 Md	TFAM	25.5861					C11	PH7.4 Md	mbactin	17.4895
C6	PH7.4 Md	TFAM	25.9561	25.7711	8.33562	0.285178	0.82064	C11	PH7.4 Md	mbactin	17.3815	17.4355
Analysis Type	Singleplex
Endogenous Control	mbactin
RQ Min/Max Confidence Level	95.0
Reference Sample
